# Supplementary material for: A Humanized Monoclonal Antibody Cocktail to Prevent Pulmonary Ricin Intoxication
Source: MDPI journal article supplement (doi:10.3390/toxins12040215), 2020-03-29
Supplement: s1 [file s1]

# Supplementary Materials: A Humanized Monoclonal Antibody Cocktail to Prevent Pulmonary Ricin Intoxication

Yinghui Rong, Michael Pauly, Adrian Guthals, Henry Pham, Dylan Ehrbar, Larry Zeitlin and Nicholas J. Mantis \*

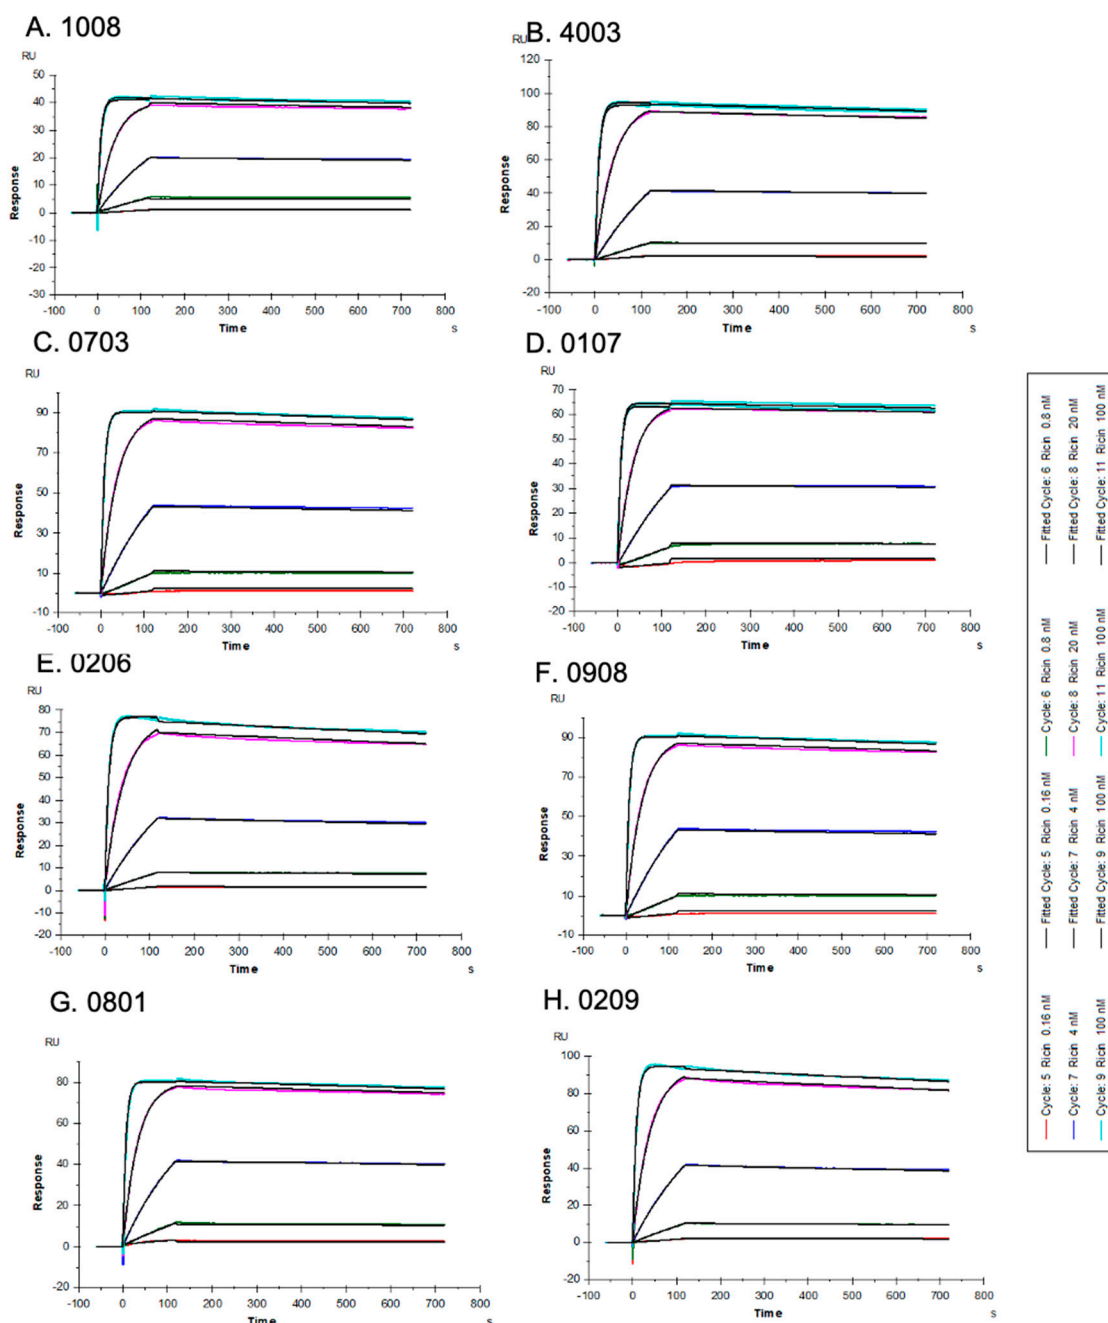

**Figure S1.** Representative sensorgrams of humanized SylH3 variants. Humanized SylH3 MAb candidates (panels A–H) diluted in running buffer were captured on Sensor Chip protein G, as described in Materials and Methods. Ricin was injected at the indicated concentrations (dark turquoise, 100 nM; fuchsia, 20 nM; blue, 4 nM; dark green 0.80 nM; red, 0.16 nM) at a flow rate of 50  $\mu$ L/min in running buffer. The chip surface was regenerated at pH 2.0 for 40–45 s following each ricin injection. Kinetic constants for the antibody/ricin interactions were obtained with Biacore T200 Evaluation Software 3.1 using the 1:1 Langmuir fit model.
